# Supplementary material
Source: publisher figshare collection journal article supplement (https://gsajournals.figshare.com/ndownloader/files/26897825)
Supplement: Supplementary file 1 [file 26897825]

**APPENDIX S1: Accession list and voucher information for samples used in this study:** Samples used in the study; geographical origin of the species; GenBank accession numbers of cpDNA (complete plastid genome); data not used in the study (-); Dryad Digital Repository of cpDNA (*) available through: https://datadryad.org/stash/share/LkbLwUlzW_GJ5rBDMHYZz69S19HzkNWY6fPOySH9tBQ.

| **Species** | **BGT database number** | **Voucher information and collection locality** | **Geographic distribution** | **Dryad accession (complete chloroplast)** | **Genbank accession (complete chloroplast)** |
| --- | --- | --- | --- | --- | --- |
| *Adansonia digitata* L. | WAG8001190 | Naturalis, WAG8001190 (Gabon; Nyanga; Mayumba) | Madagascar, mainland Africa, Arabia | * | - |
| *Adansonia digitata* L. | BGT4394 | BGT, Singapore Botanic Gardens | Madagascar, mainland Africa, Arabia | * | - |
| *Bombacopsis glabra* (Pasq.) Robyns | BGT4531 | BGT, Yunnan, China | Brazil | * | - |
| *Bombax ceiba* L. | BGT4596 | BGT, Yunnan, China | Tropical and subtropical Asia to northern Australia | * | - |
| *Bombax malabaricum* DC. | BGT4592 | BGT, Yunnan, China | Tropical and subtropical Asia to northern Australia | * | - |
| *Ceiba insignis* (Kunth) P.E.Gibbs & Semir | Strijk4467 | BGT, Qin Xiu Shan, Guangxi, China | Ecuador, Peru | * | - |
| *Chorisia speciosa* A. St.-Hil. | BGT4595 | BGT, Yunnan, China | Argentina, Brazil, Peru | * | - |
| *Cola micrantha* K.Schum. | WAG8003629 | Naturalis. WAG8003629 (Cameroon; Littoral; in the proposed Ebo forest reserve) | Cameroon | * | - |
| *Colona floribunda* (Kurz) Craib | BGT4483 | BGT, Yunnan, China | Assam, China, Indo-China | * | - |
| *Dicranolepis disticha* Planch. | WAG8003655 | BGT, Yishun, Singapore | tropical Africa | * | - |
| *Dipterocarpus alatus* Roxb. | BGT4300 | BGT, Hangzhou, China | NE India to Peninsula Malaysia, Philippines (Luzon) | * | - |
| *Edgeworthia chrysantha* Sieb. & Zucc. | Strijk4048 | BGT, Yunnan, China | S China to N Myanmar | * | - |
| *Eriolaena spectabilis* (DC.) Planch. ex Mast. | BGT4474 | Naturalis WAG8003579 (Italy; Liguria; Dolcedo) | Himalaya to China Central and SE Yunnan, S Guizhou, NW Guangxi | * | - |
| *Lavatera punctata* All. | WAG8003579 | BGT, Yunnan, China | Mediterranean | * | - |
| *Microcos paniculata* L. | BGT4575 | Naturalis  WAG8003696 (Cameroon; Littoral; in the proposed Ebo forest reserve) | India to S China and Malesia | * | - |
| *Peddiea africana* Harv. | WAG8003696 | BGT, Yunnan, China | Africa south of Sahara | * | - |
| *Pentace triptera* Mast. | BGT7001 | BGT, Yunnan, China | Peninsula Thailand to W Malesia | * | - |
| *Pterospermum kingtungense* C.Y. Wu ex H.H. Hsue | BGT4497 | Naturalis,  WAG8004058 (Gabon; Estuaire; Libreville, Sibang Arboretum) | China (SW Yunnan) | * | - |
| *Reevesia thyrsoidea* Lindl. | BGT4519 | BGT, Yunnan, China | China (S Guangxi, Guangdong) to Indo-China | * | - |
| *Scaphopetalum longepedunculatum* Mast. | WAG8004058 | BGT, Yunnan, China | Gabon and Cameroon | * | - |
| *Sterculia lanceifolia* Roxb. | BGT4602 | BGT, Yunnan, China | Assam to China (S Sichuan, S Yunnan, Guizhou) | * | - |
| *Sterculia lanceolata* Cav. | BGT4498 | BGT, Yunnan, China | S China to Indo-China | * | - |
| *Sterculia lanceolata* Cav. | BGT4537 | BGT, Yunnan, China | S China to Indo-China | * | - |
| *Sterculia micrantha* Chun and H.H. Hsue | BGT4482 | BGT, Yunnan, China | China (S Yunnan) | * | - |
| *Theobroma* sp. | BGT4535 | Naturalis,  WAG8001343 (Gabon; Ogooué-Ivindo) | Neotropics | * | - |
| *Theobroma cacao f. pentagonum* (Bernoulli) Cuatrec | BGT4534 | BGT, Yunnan, China | Neotropics | * | - |
| *Urena lobata* L. | WAG8001343 | Naturalis, WAG8001190 (Gabon; Nyanga; Mayumba) | Pantropical weed, Brazil - SE Asia | * | - |
| *Urena lobata* L. | BGT4494 | BGT, Singapore Botanic Gardens | Pantropical weed, Brazil - SE Asia | * | - |
| *Abelmoschus esculentus* (L.)Moench | NC035234 | Austin, USA | Bangladesh, India, Myanmar | - | NC035234 |
| *Althaea officinalis* L. | KY085914 | - | Europe to Central Siberia and Pakistan, NW. Africa | - | KY085914 |
| *Aquilaria sinensis* (Lour.) Gilg | NC029243 | Hainan, China | SE China to Hainan | - | NC029243 |
| *Arabidopsis arenosa* (L.) Lawalrée | LT161918 | - | Greenland, Europe | - | LT161918 |
| *Arabidopsis thaliana* L. | NC000932 | USA | native to Eurasia and Africa | - | NC000932 |
| *Arabis alpina* L. | HF934132 | French Alps | N and Central Europe to W Central Siberia, N and E Canada to Greenland | - | HF934132 |
| *Bombax ceiba* L. | MG569974 | Yunnan, China | Tropical and subtropical Asia to northern Australia | - | MG569974 |
| *Durio zibethinus* L. | MG138151 | Thailand | Sumatra to Borneo | - | MG138151 |
| *Firmiana major* W. Smith Hand.-Mazz. | MG229069 | Sichuan, China | China (SW Sichuan, W and Central Yunnan) | - | MG229069 |
| *Gossypium barbadense* L. | NC008641 | Kyoto, Japan | Colombia to Peru | - | NC008641 |
| *Gossypium herbaceum* L. | JF317353 | - | Syria to Afghanistan and S Arabian Peninsula | - | JF317353 |
| *Gossypium hirsutum* L. | NC007944 | Coker310FR | Mexico to Ecuador and NE Brazil | - | NC007944 |
| *Gossypium turneri* Fryxell | NC026835 | - | Mexico (Sonora) | - | NC026835 |
| *Hibiscus syriacus* L. | NC026909 | Korea | S China, Taiwan | - | NC026909 |
| *Talipariti hamabo* Siebold & Zucc. | NC030195 | China | China (Zhejiang), S Korea, S Central and S Japan to Nansei-shoto | - | NC030195 |
| *Theobroma cacao* L. | NC014676 | Trinidad and Tobago | Brazil, Ecuador, Mexico, Venezuela | - | NC014676 |
| *Tilia amurensis* Kom. | NC028588 | Heilongjiang, China | Russian Far East to Korea | - | NC028588 |
| *Tilia mandshurica* Rupr. & Maxim. | KT894773 | Heilongjiang, China | Russian Far East to N and E Central China and Central Japan | - | KT894773 |
| *Tilia oliveri* Szyszył. | NC028590 | Chongqing, China | China (Gansu, Hubei, Hunan, Shaanxi, Sichuan) | - | NC028590 |

Distribution data collected from African Plant Database (African Plant Database, 2019), Flora of China (eFloras, 2008), GBIF (GBIF.org, 2019), Naturalis (Naturalis, 2019), Kew’s Plants of the World Online (POWO. 2019), asianplant.net (Slik, 2009 onwards), Tropicos (Tropicos.org, 2019), Kew’s World Checklist of Selected Plant Families (WCSP. 2019).

**LITERATURE CITED**

African Plant Database. 2019 Conservatoire et Jardin botaniques de la Ville de Genève and South African National Biodiversity Institute,

Pretoria, ver. 3.4.0. Website http://www.ville-ge.ch/musinfo/bd/cjb/africa/ [accessed 15 March 2019].

eFloras. 2008 Missouri Botanical Garden, St. Louis, MO & Harvard University Herbaria, Cambridge, MA. Website http://www.efloras.org [accessed 15 March 2019].

GBIF.org. 2019 GBIF Home Page. Website https://www.gbif.org [accessed 10 March 2019].

Naturalis. 2019 Naturalis Home Page. Website <https://www.naturalis.nl/> [accessed 15 March 2019].

POWO. 2019 Plants of the World Online. Facilitated by the Royal Botanic Gardens, Kew. Website http://www.plantsoftheworldonline.org/ [accessed 15 March 2019].

Slik, J. W. F. 2009 onwards. Plants of Southeast Asia. Website http://www.asianplant.net/ [accessed 15 March 2019].

Tropicos.org. 2019 Missouri Botanical Garden, St. Louis, MO, USA. Website https://www.tropicos.org [accessed 10 March 2019].

WCSP. 2019 World Checklist of Selected Plant Families. Facilitated by the Royal Botanic Gardens, Kew. Website http://wcsp.science.kew.org/ [accessed 15 March 2019].
